# Supplementary material for: Physician-Led Thoracic Trauma Management in a Specialist Emergency Care Centre
Source: MDPI journal article supplement (doi:10.3390/jcm10245806), 2021-12-11
Supplement: s1 [file s1]

Table S1: comparison of variables between those under 65 years of age to those over 65 years.

|                                                        | Age under 65 years                     | Age above 65 years of age              | <i>P</i> value |
|--------------------------------------------------------|----------------------------------------|----------------------------------------|----------------|
| Number of patients                                     | 36                                     | 83                                     | not applicable |
| Number with no comorbidities                           | 12                                     | 7                                      | 0.0084         |
| Number with 1 comorbidity                              | 12                                     | 3                                      | 0.0003         |
| Number with more than 1 comorbidity                    | 12                                     | 73                                     | 0.0076         |
| Trauma assessment (Pan CT or full clinical assessment) | 23                                     | 52                                     | 1              |
| Falls from standing (less than 2m)                     | 5                                      | 79                                     | 0.00001        |
| Average number of rib fractures                        | 4.25 (0-9)                             | 3.4 (0-10)                             | 0.499          |
| Length of stay (days)                                  | Mean 5, median 4 (Range 1–14, IQR 5.5) | Mean 8.4, median 6 (Range 1–54, IQR 7) |                |
| Incidence of pneumonia (total number)                  | 4                                      | 21                                     | 0.22           |
| Mortality (total number)                               | 0                                      | 16                                     | 0.006          |
